# Supplementary figures and images for: Increased hypolipidemic benefits of cis-9, trans-11 conjugated linoleic acid in combination with trans-11 vaccenic acid in a rodent model of the metabolic syndrome, the JCR:LA-cp rat
Source: Springer Nature journal article supplement (doi:10.1186/1743-7075-7-60), 2010-07-16

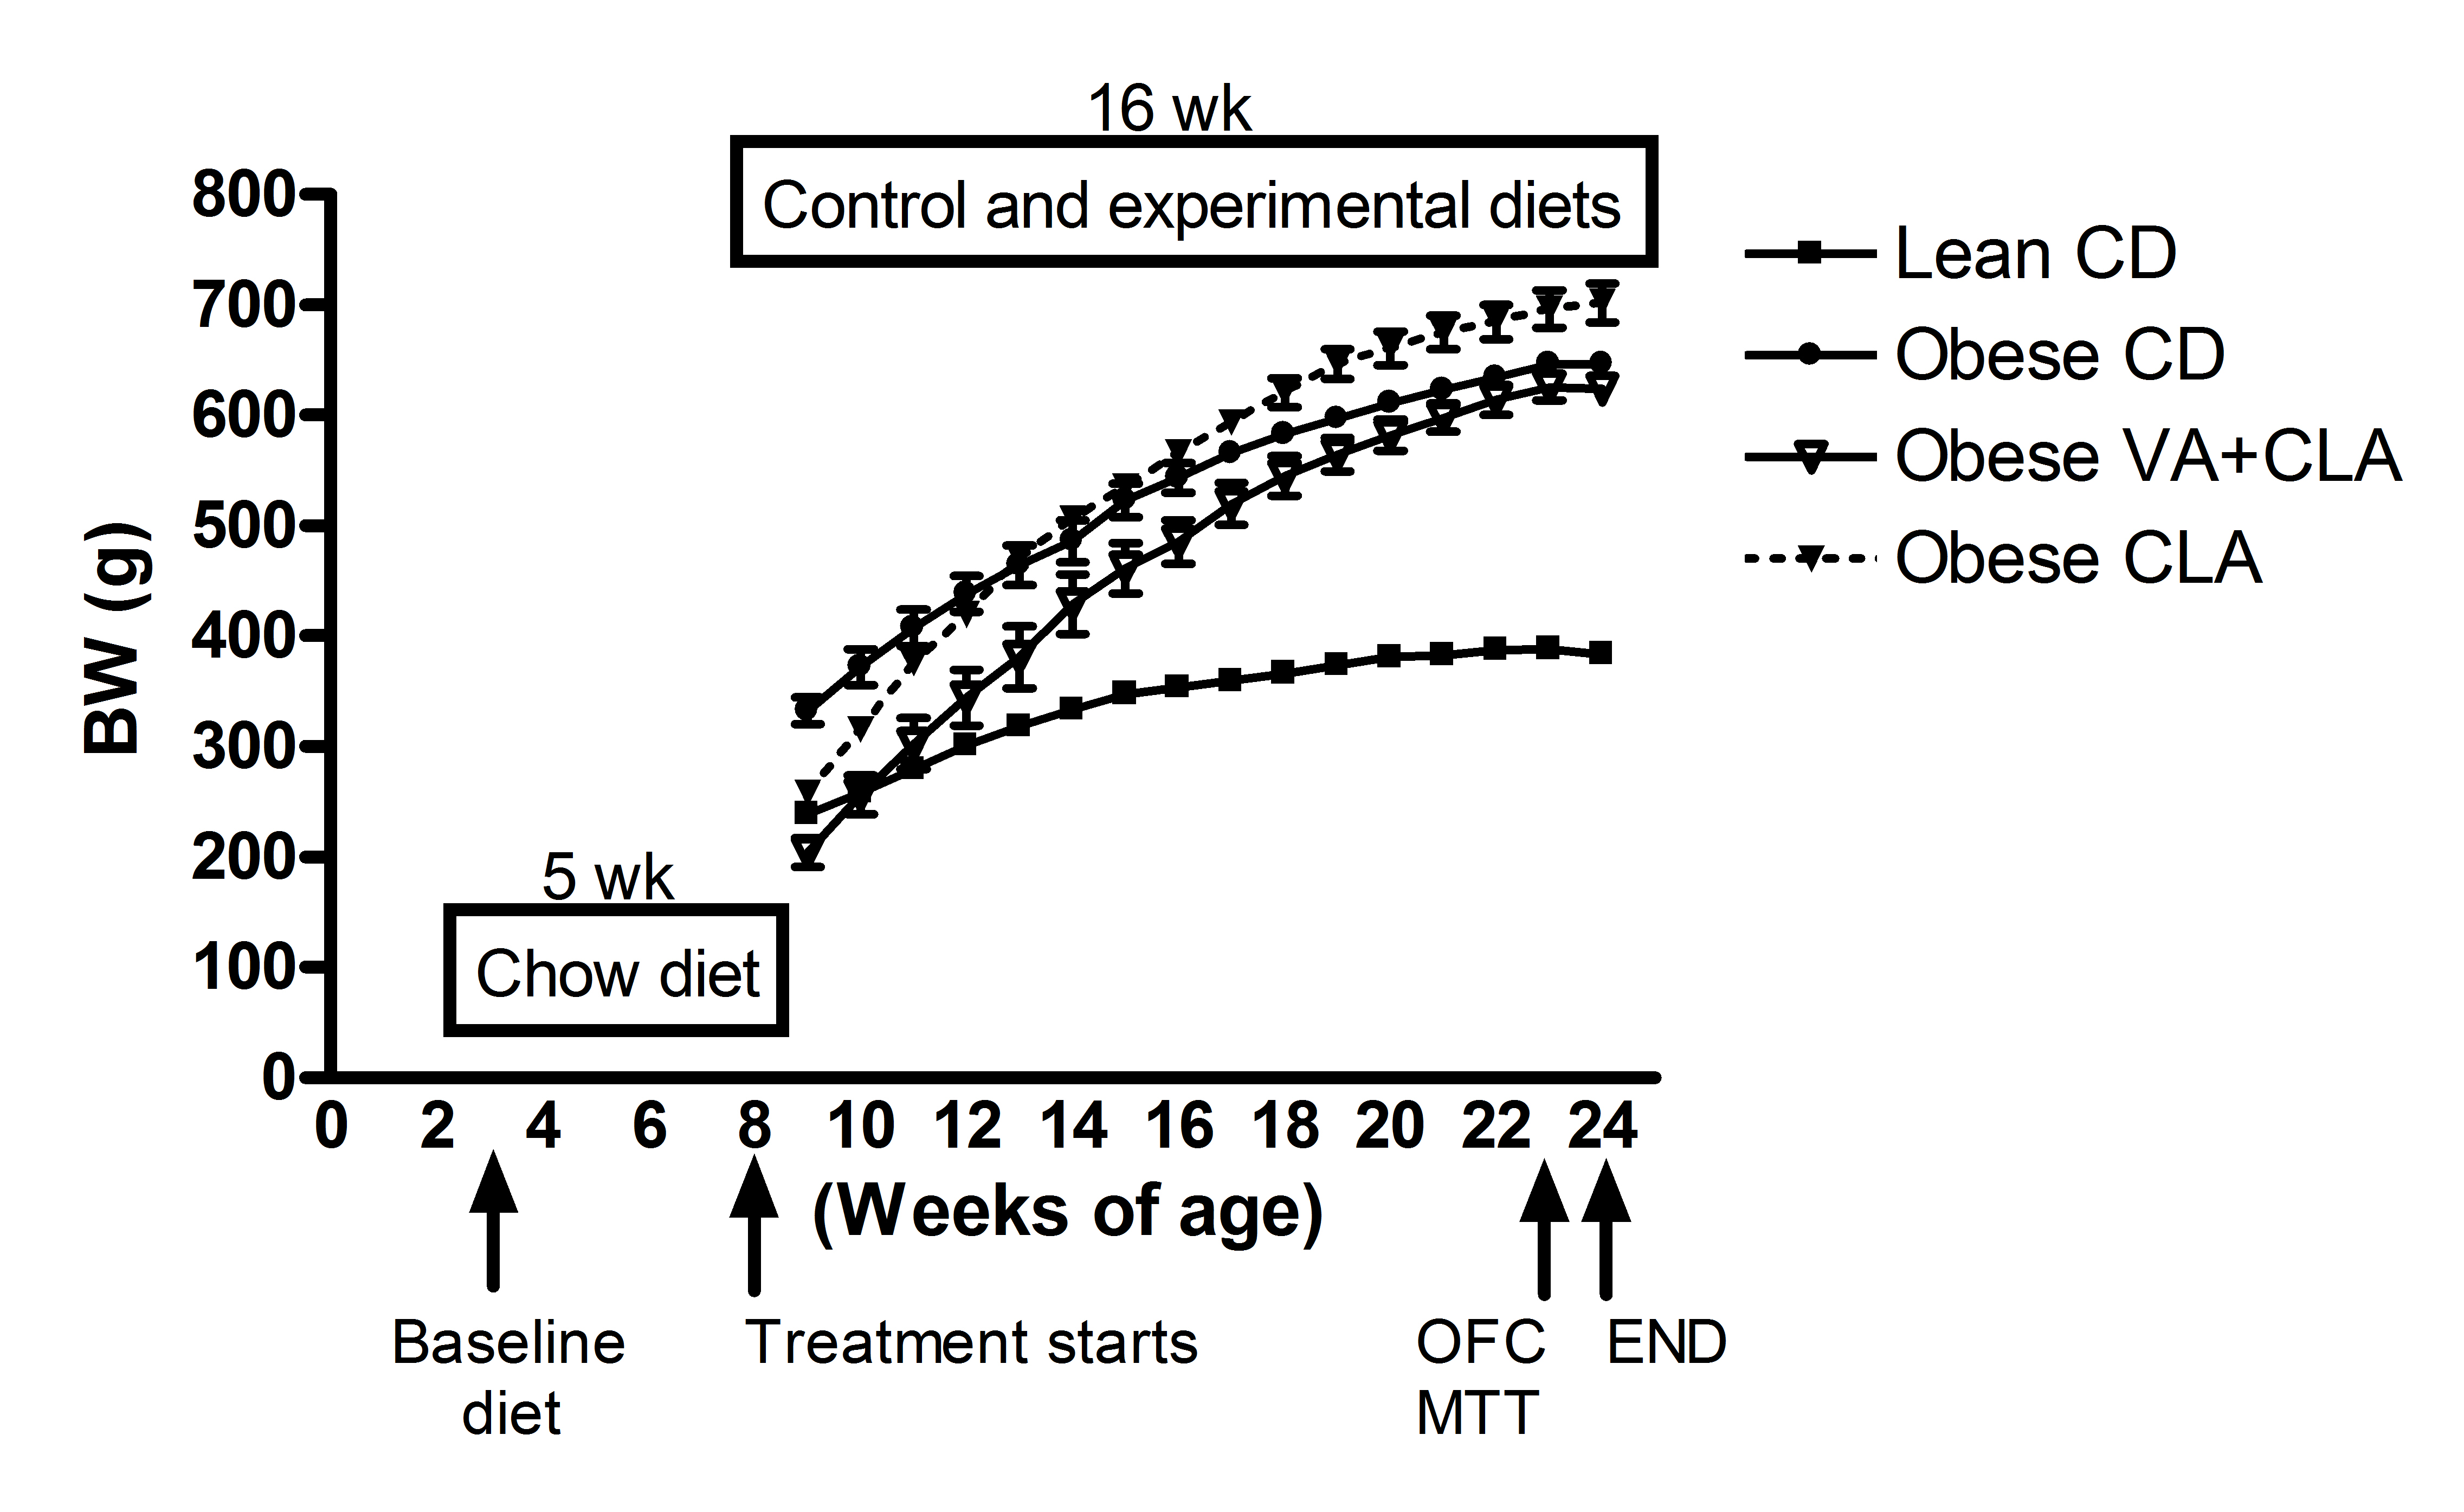

Supplement: Additional file 1 [file 1743-7075-7-60-s1.doc]
